# Supplementary material for: Level of episiotomy practice and its disparity among primiparous and multiparous women in Ethiopia: a systematic review and meta-analysis
Source: PubMed Central journal article supplement (PMC10657876; doi:10.3389/fgwh.2023.1153640), 2023-11-06

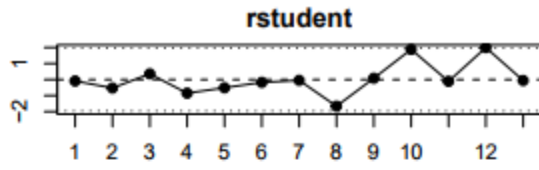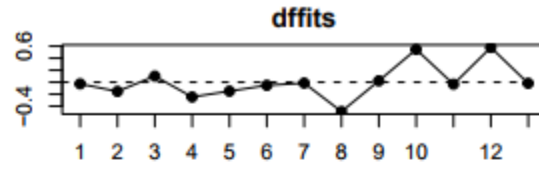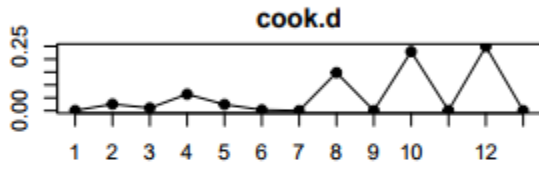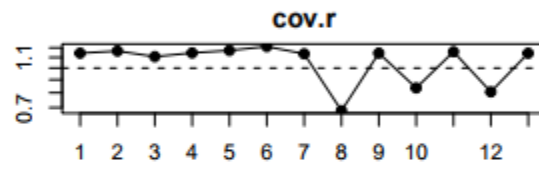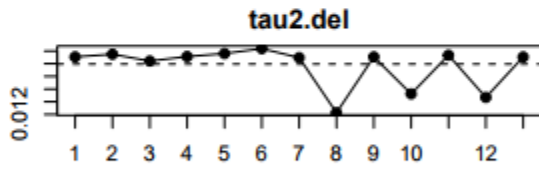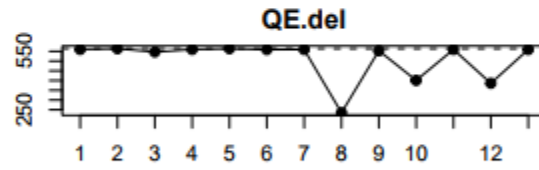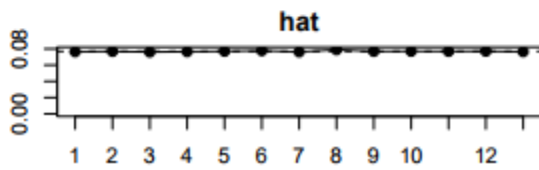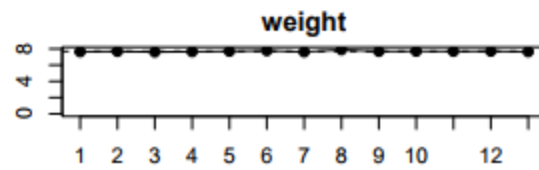

Supplement: Image1.pdf [file Image1.pdf]
